# Supplementary material
Source: publisher figshare collection journal article supplement (https://frontiersin.figshare.com/ndownloader/files/29571426)
Supplement: Supplementary file 1 [file 29571426]

Archive with 1 entries (1 files):
- SuppMat_ParticipatoryQualitativeModelling_Revisions.html
